# Supplementary material for: Tuning metal@metal salt photocatalytic abilities by different charged anions
Source: Royal Society of Chemistry journal article supplement (doi:10.1039/c0dt00824a), 2010-01-01
Supplement: c0dt00824a.pdf [file c0dt00824a.pdf]

## Tuning Metal@Metal Salts Photocatalytic by Different Charged Anions (Supporting information)

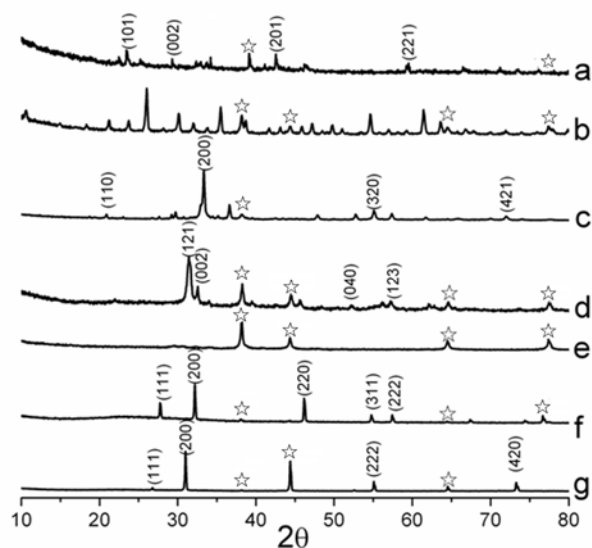

**Figure S1.** The index of all XRD peaks of Ag@Ag salts: (a) Ag@AgI, (b) Ag@Ag<sub>3</sub>PW<sub>12</sub>O<sub>40</sub>, (c) Ag@Ag<sub>3</sub>PO<sub>4</sub>, (d) Ag@Ag<sub>2</sub>CrO<sub>4</sub>, (e) Ag@Ag<sub>4</sub>SiW<sub>12</sub>O<sub>40</sub>, (f) Ag@AgCl, and (g) Ag@AgBr.

☆ denotes the XRD peaks of AgNPs.

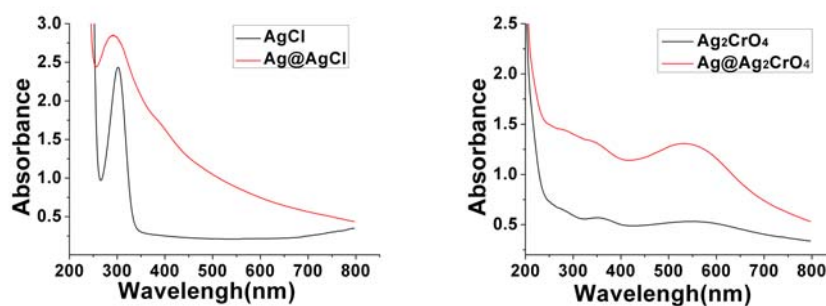

**Figure S2.** UV-Vis diffuse-reflectance spectra of Ag salts and Ag@Ag salts: (a) AgCl and Ag@AgCl; (b) Ag<sub>2</sub>CrO<sub>4</sub> and Ag@Ag<sub>2</sub>CrO<sub>4</sub>.

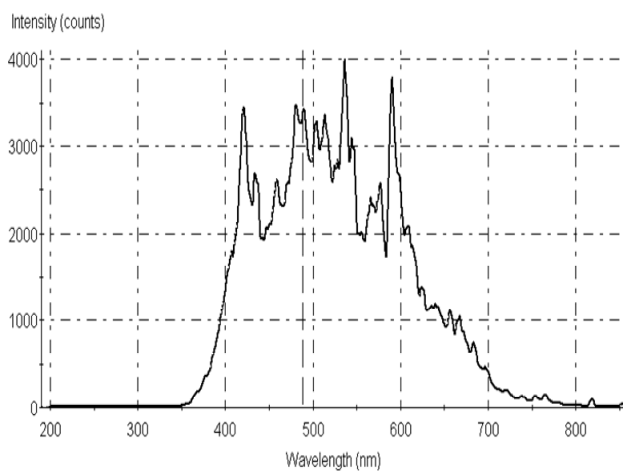

**Figure S3.** Spectrum of the halogen lamp.

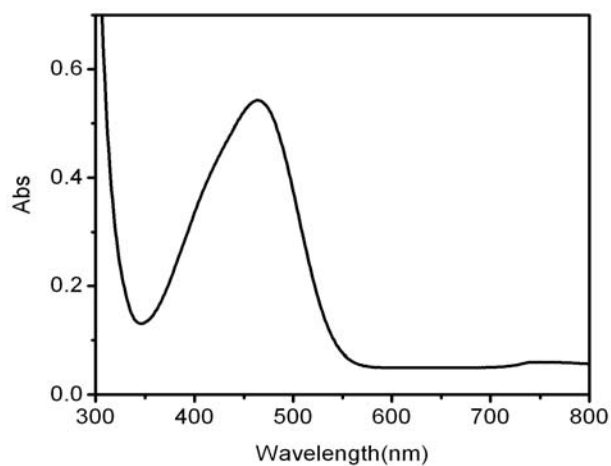

**Figure S4.** Ultraviolet-visible spectrum of the methyl orange (MO) solution.

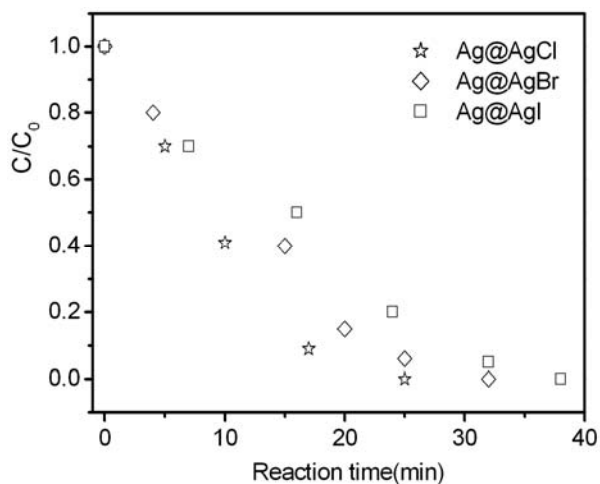

**Figure S5.** Photocatalytic activity of different Ag@Ag salts catalysts with same charged anions. C is the concentration of MO at reaction time t and C<sub>0</sub> is the initial concentration of MO .

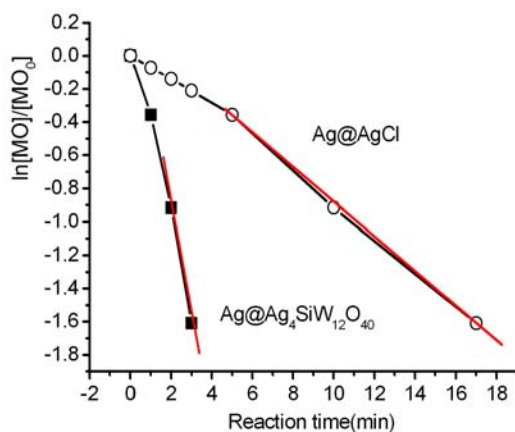

**Figure S6.** Degradation rate of MO, semi-logarithmic (left) and in linear (right) scales, assisted with Ag@Ag<sub>4</sub>SiW<sub>12</sub>O<sub>40</sub> and Ag@AgCl.

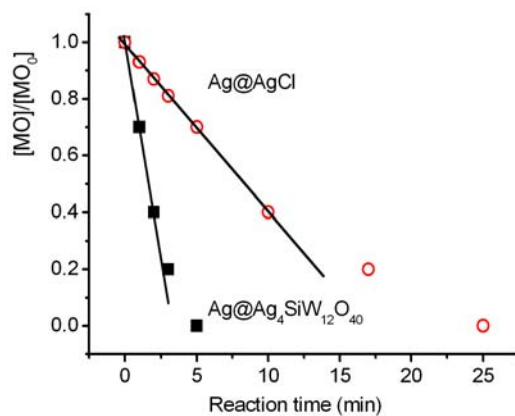

**Figure S7.** Degradation rate of MO, in linear (left) and semi-logarithmic (right) scales, assisted with Ag@Ag<sub>4</sub>SiW<sub>12</sub>O<sub>40</sub> and Ag@AgCl.
